# Supplementary material for: PtomtAPX, a mitochondrial ascorbate peroxidase, plays an important role in maintaining the redox balance of Populus tomentosa Carr
Source: PubMed Central journal article supplement (PMC6925217; doi:10.1038/s41598-019-56148-w), 2019-12-20
Supplement: 41598_2019_56148_MOESM1_ESM.pdf [file 41598_2019_56148_MOESM1_ESM.pdf]

***PtomtAPX*, a mitochondrial ascorbate peroxidase, plays an important role in  
maintaining the redox balance of *Populus tomentosa* Carr.**

Bin Yin<sup>a,b,1</sup>, Jiaxue Zhang<sup>b,1</sup>, Yadi Liu<sup>b,1</sup>, Xiang Pan<sup>b,1</sup>, Zhijing Zhao<sup>b</sup>, Hui Li<sup>b</sup>,  
Chong Zhang<sup>b</sup>, Conghui Li<sup>b</sup>, Xihua Du<sup>b</sup>, Yinjun Li<sup>b</sup>, Di Liu<sup>b,2</sup>, Hai Lu<sup>a,b,2</sup>

<sup>a</sup>Beijing Advanced Innovation Center for Tree Breeding by Molecular Design,  
Beijing Forestry University, Beijing 100083, People's Republic of China

<sup>b</sup>College of Biological Sciences and Biotechnology, Beijing Forestry University,  
Beijing 100083, People's Republic of China

<sup>1</sup>These authors contributed equally to this work

<sup>2</sup> Correspondence Author: liudi@bjfu.edu.cn; luhai1974@bjfu.edu.cn

## Supplementary Information

The following materials are available in the online version of this article.

**Supplemental Figure 1.** Nucleotide and deduced amino acid sequences of *PtomtAPX* and *PtosAPX*. Box, signal peptide sequence; arrow, cleavage site; asterisk, stop codon.

**Supplemental Figure 2.** Phylogenetic tree of APXs.

Sequences of APXs from *Arabidopsis thaliana*, *Oryza sativa*, *Zea mays*, *Selaginella moellendorffii*, *Chlamydomonas reinhardtii*, *Volvox carteri*, *Coccomyxa subellipsoidea*, *Ostreococcus lucimarinus*, *Micromonas pusilla*, *Brassica rapa*, *Glycine max*, *Populus trichocarpa*, and *Populus tomentosa* were used. The phylogenetic tree was generated by the neighbor-joining method with 1,000 bootstraps using MEGA 6. The rectangular box shows the position of *PtomtAPX* and *PtosAPX*.

**Supplemental Figure 3.** Localization of ROS in mitochondria of various cell lines stained using CMXRos and H2DCFDA.

(A,D,G,J,M) Mitochondria stained using CMXRos. (B,E,H,K,N) Mitochondria stained using H2DCFDA. (C,F,I,L,O) Merged images. Bars, 10  $\mu$ m.

**Supplemental Figure 4.** Mitochondrial oxidant levels.

(A) ASA:DHA ratio. (B) GSH:GSSG ratio. (C) MDA content. (D) Carbonylation of mitochondrial proteins. \*\*significantly different at  $P < 0.01$ . Bars, standard deviations.

**Supplemental Figure 5.** Mitochondrial morphology and activity in *PtomtAPX*-overexpressed cells under  $H_2O_2$  and AsA treatment.

(A) Mitochondrial  $H_2O_2$  content under  $H_2O_2$  treatment. (B) Mitochondrial ATP:ADP ratio under  $H_2O_2$  treatment. (C) Frequencies of the types of mitochondria under  $H_2O_2$  treatment. (D)  $\Delta\psi_m$  of mitochondria under  $H_2O_2$  treatment (JC-1 staining). Frequencies and ratios were calculated based on 200 cells. WT, untreated WT cells; OX, untreated *PtomtAPX*-overexpressed cells; OX-10, 10 mM  $H_2O_2$  treatment; OX-100, 100 mM  $H_2O_2$  treatment. \*\*significantly different at  $P < 0.01$ . Bars, standard

deviations.

**Supplemental Figure 6** (A) Full-length blot of anti-PtomtAPX antibodies.(B) Full-length blot of anti-PtosAPX antibodies.(C) Full-length blot of Carbonylation of mitochondrial proteins

**Supplemental Figure 7.** Isolation of mitochondria by density centrifugation.

(A) The organelle pellet from *P. tomentosa* leaves or homogenized cells was loaded onto a Percoll step gradient consisting of steps of 40% (fractions 27–30), 23% (fractions 10–26), and 18% Percoll (fractions 1–9). After centrifugation, mitochondria were recovered from the 40%:23% interface (fractions 18–30). (B) recovered mitochondria were loaded onto a self-forming Percoll gradient containing 28% Percoll. Fractions (1 mL) were collected from both gradients (from top to bottom) and analyzed for the activities of marker enzymes of mitochondria.

**Supplemental Table 1.** Primers used for molecular cloning, plasmid construction, and qRT-PCR analyses.

**Supplemental Dataset 1.** Significant up regulation or down regulation of differentially expressed genes (DEGs) (P-value <0.001, fold change >1.5 or <-1.5) in *anti-3*; DEGs in *OX* and their expression in *OX-H*, both comparing with WT. WT, untreated WT; *OX*, untreated *PtomtAPX*-overexpressed cells; *anti-3*, untreated *PtomtAPX*-antisense cells; *OX-H*, *PtomtAPX*-overexpressed cells treated with 10 mM H<sub>2</sub>O<sub>2</sub>.

**Supplemental Dataset 2.** Gene ontology (GO) term enrichment of differentially expressed genes (DEGs) in *anti-3* and *OX*.

GO terms that are significantly enriched (P-value < 0.005) in cluster 1 to cluster 6. WT, untreated WT; *OX*, untreated *PtomtAPX*-overexpressed cells; *anti-3*, untreated *PtomtAPX*-antisense cells.

**A**

ATGGCTTCTCTCAGGGGTTCCGCCCACTGTCCGCTCTCTCTCACTCCGCTCCCGCTCGTCTCTCTCTCTCAGCGTCCCTCTCATTGTCTATTTCTCTCTCTC 110

M A S L R G S A A T V R L L H S A S R V R L S L S S A S S S L S I S S S | S S

Signal peptide Cleavage site

CTCTTACTCTCTCTCTCTCAAATGCCTCCAATCTCTCTCTCGCACCTTACATATTTAAAGATCAGCGATCGTCAATGAGCACTGTTGCTGCGGCGTGTGATCCTG 220

S Y S P S S L K C L Q F S P L A P Y I F K D Q R S S M S T V A A A S D P

CTCAGTTGAAGAGTGCAGAGAGGATATTAAGAAGCTCTCAAATCTAATCTTGGCCATCTATTCTGGTTCGGCTGGGTGGCATGACGCCGGCACACACAAGAAC 330

A Q L K S A R E D I K E L L K S N S C H P I L V R L G W H D A G T Y N K N

ATAGAGGAGTGGCCAAGAGGGGTGGAGCCAATGGAAGCTTAGATTGATATTGAACCTAAGCATGCGGCCAACGCAAGGCTCGTTAATGCATTGAAACTGATTCAGCC 440

I E E W P R R G G A N G S L R F D I E L K H A A N A G L V N A L K L I Q P

TATCAAAGACAAGTATTCTGGTGTGACATATGCGGATTGTTCCAATTGGCCAGCGCAACTGCAATAGAGGAAGCTGGTGGCCGAAAATTCCTATGAAGTATGGCAGGG 550

I K D K Y S G V T Y A D L F Q L A S A T A I E E A G G P K I P M K Y G R

TGGATGTCTCAGCTCTGAGGAATGCCAGAAAGGGGAGGCTTCTGCTGCTGGCCCCCTAAACCTGTGGATCATCTACGAGAAGTTTCTACAGAATGGGATTAAT 660

V D V S A P E E C P E E G R L P A A G P P K P V D H L R E V F Y R M G L N

GACAAGGAAATAGTTGATGTCTGGTGCACACACTAGGAAGGTCTAGACCAGAACGCAAGTGGTGGGCAAAACCAGAGACGAAGTATACGAAAAATGGACCAGGAGC 770

D K E I V A L S G A H T L G R S R P E R S G W G K P E T K Y T K N G P G A

ACCAGGAGGGCAGTCTGGACAGCAGAATGGCTGAAGTTTGACAATTCCTACTTCAAGGATATTAACAAGAAAGGATGATGATGCTGTTGATTGCCAACTGATGCTG 880

P G G Q S W T A E W L K F D N S Y F K D I K Q R K D D D L L V L P T D A

CTCTTTTTGAAGATCCTTCAATCAAGGTGTATGCAGAGAAATATGCTGAAGATCAGGAGGCACTTCTCAAGGATTATGCGGAAGCCCATGCCAAGCTAAGCAATCTGGG 990

A L F E D P S F K V Y A E K Y A E D Q E A F F K D Y A E A H A K L S N L G

GCAAAATTTGATCCTCAAGAGGGAATTTGCTAGATGGTGTGCTGGAGAGAAGTCCATGGCAGCCAAGTACTCTCCGGGAAGGATTA 1080

A K F D P Q E G I V L D G V A G E K S M A A K Y S S G K D \*

**B**

ATGGCTTCTCTCAGTGGTGGTGTGCGCACCACTTCCCGCTCTCCCTCCGCTCTCGCGTCCGCTCTCTATTTCTCAGCTCTCTCTCACTCTCTCTGCTCTCTC 110

M A S L S G G V A T T S R L L P S A S R V R R S I S S A S S S L S L A S S

Signal peptide

TTCTCTTACTCTCTCTCTCTCAAATGCCTCCGATTCCCTCCTCGTCAACCCTCATTTTTAAGGATCAGAAGCGATCGTCAATGAGCACCGTGTGCTGCGGCGTGG 220

S | S Y S P S S L K C L R F P P R S P L I F K D Q K R S S M S T V A A A S

Cleavage site

ATGCTGCTCAGTTGAAGAGTGCAGAGAGAAGATATTAAGGAGCTCTTAAATCTAAATTTTGGCCATCTATTCTGGTTCGGTGGGTGGCATGATGCAGGCACATACAAC 330

D A A Q L K S A R E D I K E L L K S K F C H P I L V R L G W H D A G T Y N

AAGAACATAGAGGAGTGGGCAAAAGGGGTGGAGCCAATGGAAGCTTAGATTGAAATTTGAACCTAAGCATGCAGCCAATGCAGGGCTTGTGATGCATTGAAACTGAT 440

K N I E E W A K R G G A N G S L R F E I E L K H A A N A G L V D A L K L I

TCAGCCTATCAAAGATAAGTATTCTGGTGTGACATATGCGGATTGTTCCAATGGCCAGCGCAACTGCTATAGAGGAAGCCGGAGGCCCAAAATTCCTATGAAGTATG 550

Q P I K D K Y S G V T Y A D L F Q M A S A T A I E E A G G P K I P M K Y

GCAGGGTGGATGTCTCAGTCCCTGATGAATGCCCTGAAGAGGGGAGGCTTCCGATGCTGGCCCCCTAAACCTGCTGATCATTACGAGGAGTTTCTATAGAATGGG 660

G R V D V S V P D E C P E E G R L P D A G P P K P A D H L R G V F Y R M G

ATTAGATGACAAGGAAATAGTTGATGTCTGGTGCACACACTAGGAAGGTCTAGACCAGAACGCAAGTGGTGGGCAAAACCAGAGACGAAGTATACGAAAAATGGGC 770

L D D K E I V A L S G A H T L G R S R P E R S G W G K P E T K Y T K N G

CTGGAGCACCAGGAGGGCAGTCTGGACAGCAGAATGGCTGAAGTTTGACAATTCGACTTCAAGGATATTAAGAAGAAAGGATGAAGATCTACTGTATTGCCAACT 880

P G A P G G Q S W T A E W L K F D N S Y F K D I K E R K D E D L L V L P T

GATGCTGCTCTTTTTGAAGATCCTTCAATCAAGGTGTATGCAGAGAAATATGCTGAAGATAAGGAGGCACTTCTCAAGGATTATGCTGAAGCCCATGCCAAGCTCAGCAA 990

D A A L F E D P S F K V Y A E K Y A E D K E A F F K D Y A E A H A K L S N

TCTTGGGCAAAATTTGATCCTCCAGAGGGAATTTGCTAGATGGTGTGCTGGAGAGAAGTGTGCTGGCAGCCAAGTACTCTCGGAAAGGACTAA 1086

L G A K F D P P E G I M L D G V A G E K F V A A K Y S S G K D \*

**Supplemental Figure 1.** Nucleotide and deduced amino acid sequences of *PtomtAPX* and *PtosAPX*. Box, signal peptide sequence; arrow, cleavage site; asterisk, stop codon.

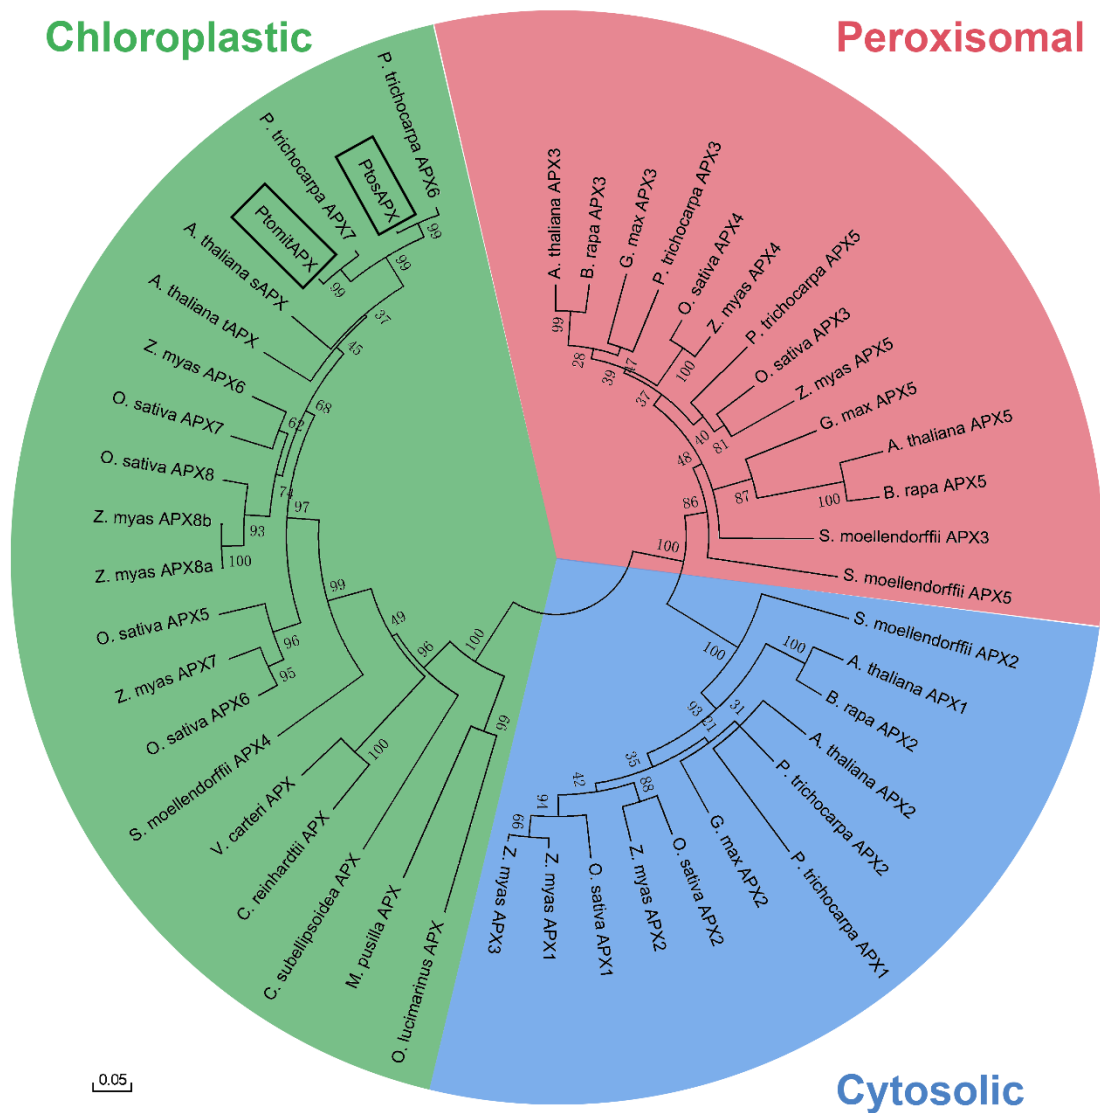

**Supplemental Figure 2.** Phylogenetic tree of APXs.

Sequences of APXs from *Arabidopsis thaliana*, *Oryza sativa*, *Zea mays*, *Selaginella moellendorffii*, *Chlamydomonas reinhardtii*, *Volvox carteri*, *Coccomyxa subellipsoidea*, *Ostreococcus lucimarinus*, *Micromonas pusilla*, *Brassica rapa*, *Glycine max*, *Populus trichocarpa*, and *Populus tomentosa* were used. The phylogenetic tree was generated by the neighbor-joining method with 1,000 bootstraps using MEGA 6. The rectangular box shows the position of *PtomtAPX* and *PtosAPX*.

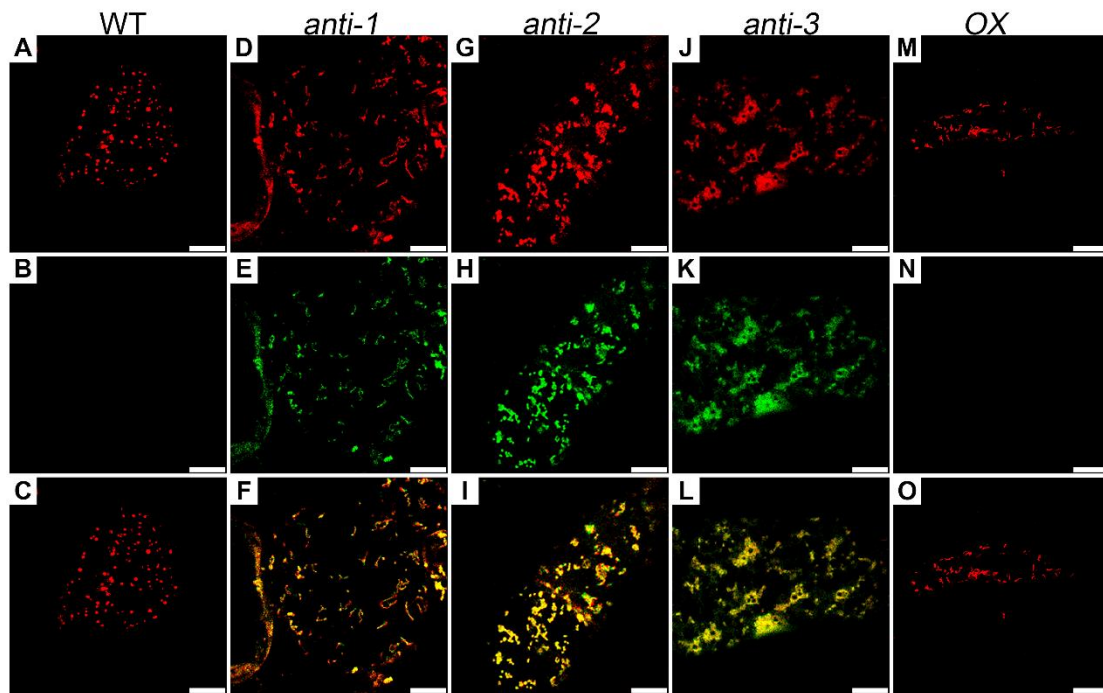

**Supplemental Figure 3.** Localization of ROS in mitochondria of various cell lines stained using CMXRos and H<sub>2</sub>DCFDA.

**(A,D,G,J,M)** Mitochondria stained using CMXRos. **(B,E,H,K,N)** Mitochondria stained using H<sub>2</sub>DCFDA. **(C,F,I,L,O)** Merged images. Bars, 10 μm.

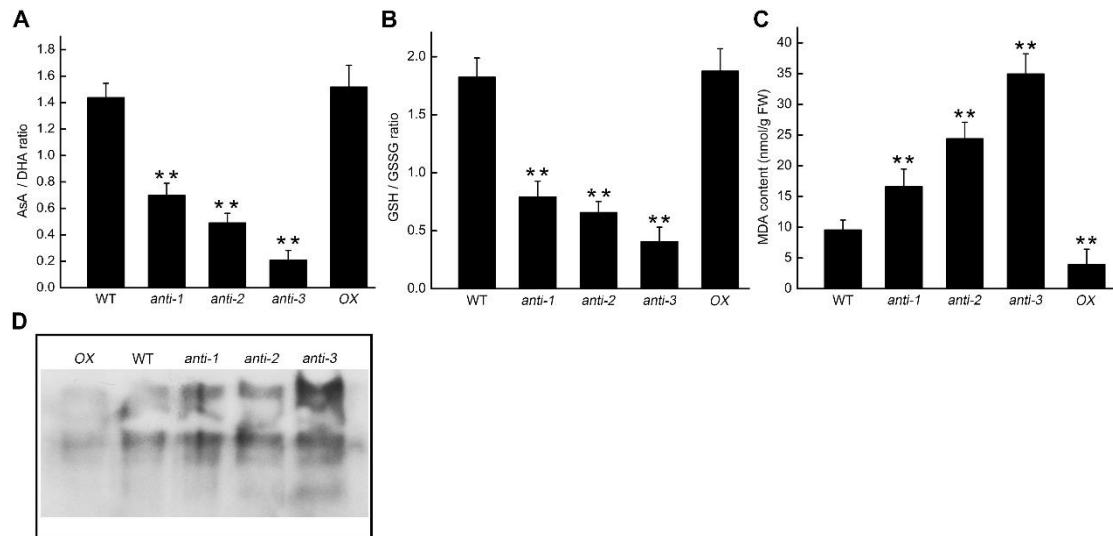

**Supplemental Figure 4.** Mitochondrial oxidant levels.

**(A)** AsA:DHA ratio. **(B)** GSH:GSSG ratio. **(C)** MDA content. **(D)** Carbonylation of mitochondrial proteins. \*\*significantly different at  $P < 0.01$ . Bars, standard deviations.

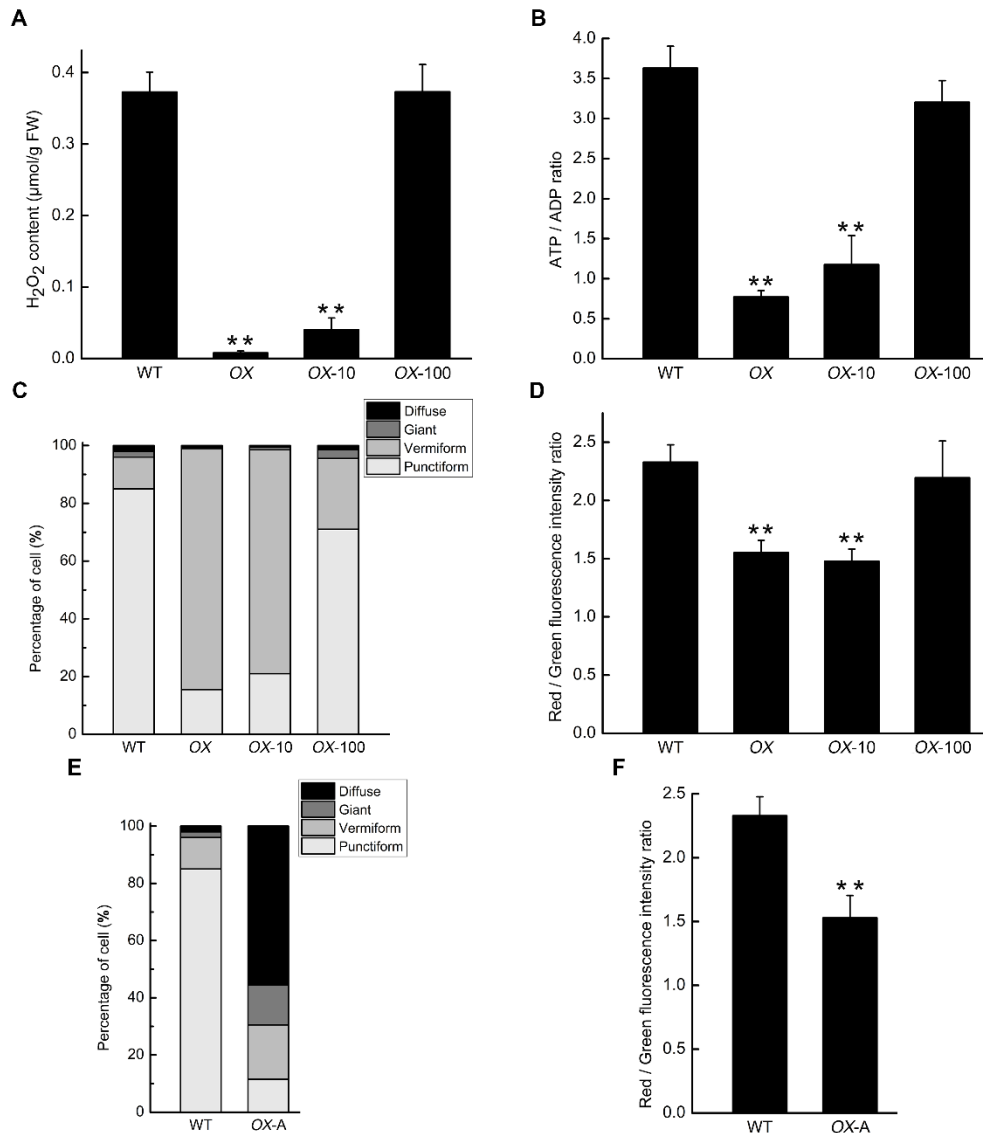

**Supplemental Figure 5.** Mitochondrial morphology and activity in *PtomtAPX*-overexpressed cells under H<sub>2</sub>O<sub>2</sub> and AsA treatment.

**(A)** Mitochondrial H<sub>2</sub>O<sub>2</sub> content under H<sub>2</sub>O<sub>2</sub> treatment. **(B)** Mitochondrial ATP:ADP ratio under H<sub>2</sub>O<sub>2</sub> treatment. **(C)** Frequencies of the types of mitochondria under H<sub>2</sub>O<sub>2</sub> treatment. **(D)** Δψ<sub>m</sub> of mitochondria under H<sub>2</sub>O<sub>2</sub> treatment (JC-1 staining). **(E)** Frequencies of the types of mitochondria under AsA treatment. **(F)** Δψ<sub>m</sub> of mitochondria under AsA treatment (JC-1 staining). Frequencies and ratios were calculated based on 200 cells. WT, untreated WT cells; OX, untreated *PtomtAPX*-overexpressed cells; OX-10, 10 mM H<sub>2</sub>O<sub>2</sub> treatment; OX-100, 100 mM H<sub>2</sub>O<sub>2</sub> treatment; and OX-A, 1 mM AsA treatment. \*\*significantly different at P < 0.01. Bars, standard deviations.



A

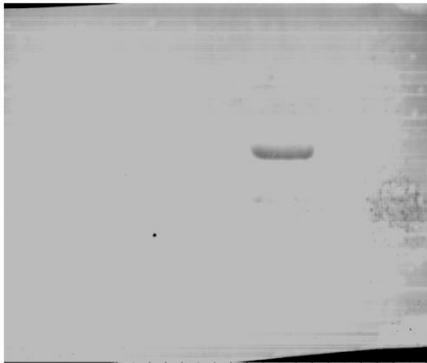

B

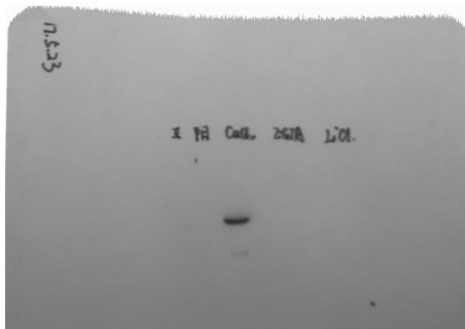

C

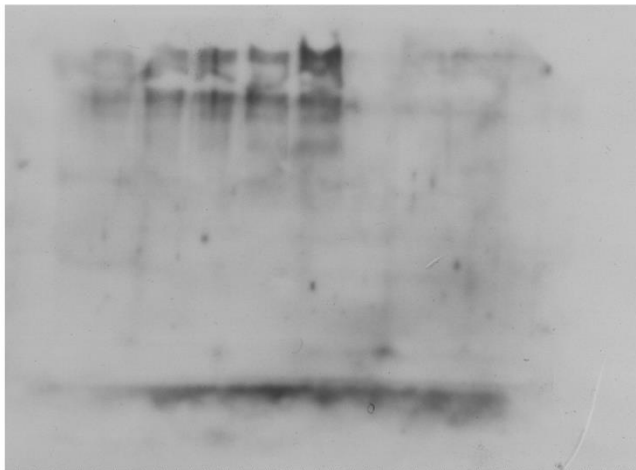

**Supplemental Figure 6.**(A) Full-length blot of anti-PtomtAPX antibodies.(B) Full-length blot of anti-PtosAPX antibodies.(C) Full-length blot of Carbonylation of mitochondrial proteins

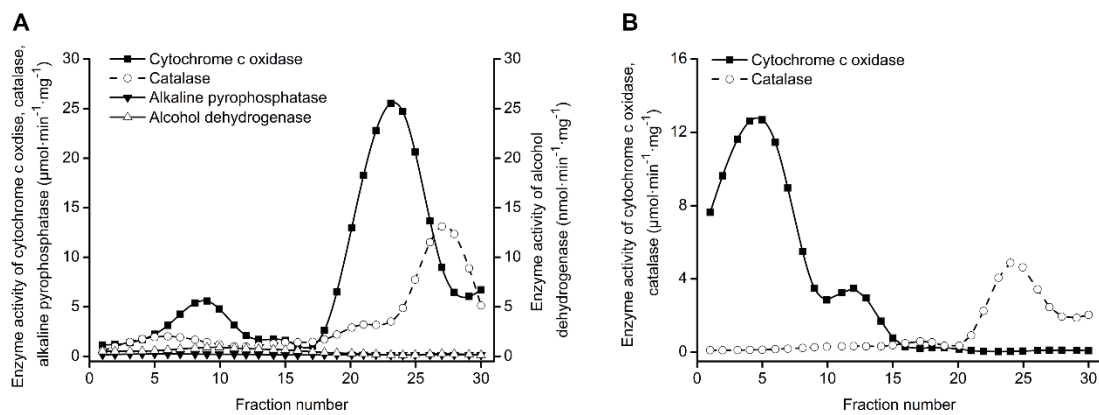

**Supplemental Figure 7.** Isolation of mitochondria by density centrifugation.

**(A)** The organelle pellet from *P. tomentosa* leaves or homogenized cells was loaded onto a Percoll step gradient consisting of steps of 40% (fractions 27–30), 23% (fractions 10–26), and 18% Percoll (fractions 1–9). After centrifugation, mitochondria were recovered from the 40%:23% interface (fractions 18–30). **(B)** recovered mitochondria were loaded onto a self-forming Percoll gradient containing 28% Percoll. Fractions (1 mL) were collected from both gradients (from top to bottom) and analyzed for the activities of marker enzymes of mitochondria.

**Supplemental Table 1.** Primers used for molecular cloning, plasmid construction, and qRT-PCR analyses.

| Primers                | Primer sequences (5'-3')       | Restriction sites |
|------------------------|--------------------------------|-------------------|
| <i>PtomtAPX-F</i>      | CGCAACCAATGGCTTCTCTCAG         | N/A               |
| <i>PtomtAPX-R</i>      | ACACCGCAATTAAGCCAAGTG          | N/A               |
| <i>PtosAPX-F</i>       | ATGGCTTCTCTCAGTGGTG            | N/A               |
| <i>PtosAPX-R</i>       | GTCCTTCCAGAGGAGTACTTG          | N/A               |
| <i>G-PtomtAPX-F</i>    | CCGCTCGAGATGGCTTCTCT           | <i>Xho</i> I      |
| <i>G-PtomtAPX-R</i>    | GGACTAGTATCCTTCCCGGA           | <i>Spe</i> I      |
| <i>G-PtosAPX-F</i>     | CCGCTCGAGATGGCTTCTCT           | <i>Xho</i> I      |
| <i>G-PtosAPX-R</i>     | GGACTAGTATTTCCAAGAAGAGATG      | <i>Spe</i> I      |
| <i>OX-PtomtAPX-F</i>   | CGGGATCCATGGCTTCTCTCAGGGGTTC   | <i>BamH</i> I     |
| <i>OX-PtomtAPX-R</i>   | CGAGCTCTTAATCCTTCCCGGAAGAGTA   | <i>Sac</i> I      |
| <i>anti-PtomtAPX-F</i> | CGAGCTCATGGCTTCTCTCAGGGGTTC    | <i>Sac</i> I      |
| <i>anti-PtomtAPX-R</i> | CGGGATCCTTAATCCTTCCCGGAAGAGTA  | <i>BamH</i> I     |
| <i>P-PtomtAPX-F</i>    | CGGGATCCTACTCTCCTTCTCTCTCA     | <i>BamH</i> I     |
| <i>P-PtomtAPX-R</i>    | CCCAAGCTTTTAATCCTTCCCGGAAGAG   | <i>Hind</i> III   |
| <i>P-PtosAPX-F</i>     | CGGGATCC ATGGCTTCTCTCAGTGGTG   | <i>BamH</i> I     |
| <i>P-PtosAPX-R</i>     | CCCAAGCTTGTCCTTCCAGAGGAGTACTTG | <i>Hind</i> III   |
| <i>qRT-actin-F</i>     | AAACTGTAATGGTCCTCCCTCCG        | N/A               |
| <i>qRT-actin-R</i>     | GCATCATCACAACTACTCTCCGA        | N/A               |
| <i>qRT-PtomtAPX-F</i>  | CTGGAAAGAGAGAGTTGTCAG          | N/A               |
| <i>qRT-PtomtAPX-R</i>  | GTGCCAGAACAGCAATCAC            | N/A               |
| <i>qRT-PtosAPX-F</i>   | CATCCTATTCTGGTTCGGTTG          | N/A               |
| <i>qRT-PtosAPX-R</i>   | TTGGCTGCATGCTTAAGTTC           | N/A               |
| <i>qRT-PtotAPX-F</i>   | CTGGAAAGAGAGAGTTGTCAG          | N/A               |
| <i>qRT-PtotAPX-R</i>   | GTGCCAGAACAGCAATCAC            | N/A               |
